# Supplementary material for: Expression Analysis of Key Auxin Biosynthesis, Transport, and Metabolism Genes of Betula pendula with Special Emphasis on Figured Wood Formation in Karelian Birch
Source: MDPI journal article supplement (doi:10.3390/plants9111406), 2020-10-22
Supplement: s1 [file s1]

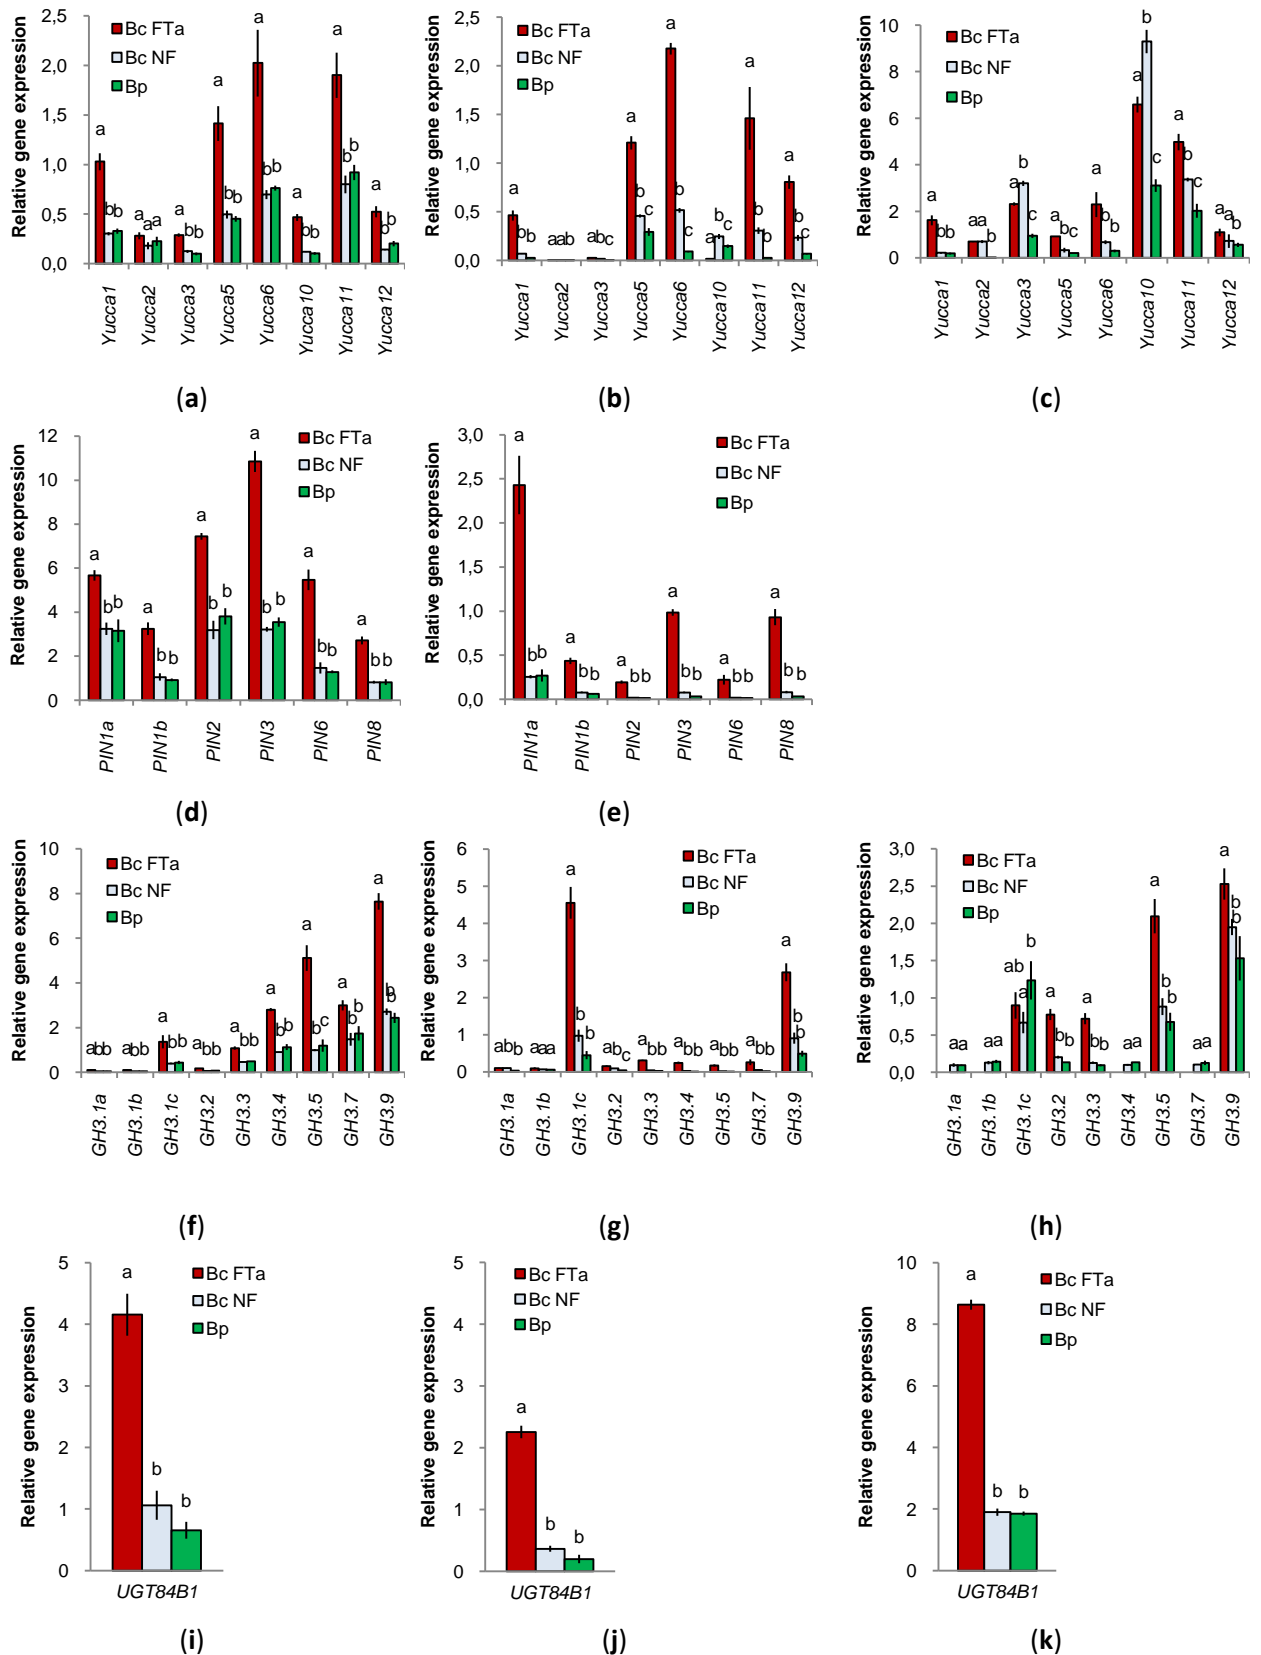

Supplementary Figure S1. Relative gene expression of all *Yucca*, *PIN*, *GH3* and *UGT* family genes: (a), (d), (f), (i) differentiating xylem; (b), (e), (g), (j) tissues layer included cambial zone and conducting phloem; (c), (h), (k) leaf. Bc FTa – figured parts of figured *B. pendula* var. *carelica* tree trunks; Bc NF - non-figured *B. pendula* var. *carelica* trees; Bp - *B. pendula* var. *pendula* trees.
